# Supplementary material for: Lizard movement tracks: variation in path re-use behaviour is consistent with a scent-marking function
Source: PeerJ. 2016 Mar 22;4:e1844. doi: 10.7717/peerj.1844 (PMC4806635; doi:10.7717/peerj.1844)
Supplement: Supplemental Information 2 [file peerj-04-1844-s002.xlsx]

## Sheet: Supplemental Material 2
Lizard	Year	Homerange_part	Reused_paths	GPS_locations	Homerange_size (ha)
2368	2009	inner	31.74	1998	7.9527
2368	2009	outer	14.26	1998	7.9527
2408	2009	inner	15.4	1587	5.0857
2408	2009	outer	12.6	1587	5.0857
4997	2009	inner	2.4	1488	15.1874
4997	2009	outer	0.6	1488	15.1874
9164	2009	inner	33	2090	3.1835
9164	2009	outer	42	2090	3.1835
9170	2009	inner	19.8	1843	4.6095
9170	2009	outer	13.2	1843	4.6095
9291	2009	inner	10.4	1526	3.5931
9291	2009	outer	5.6	1526	3.5931
9310	2009	inner	4.96	1590	4.5873
9310	2009	outer	3.04	1590	4.5873
9319	2009	inner	6.6	2459	3.879
9319	2009	outer	26.4	2459	3.879
9363	2009	inner	5.74	1737	1.2783
9363	2009	outer	1.26	1737	1.2783
9369	2009	inner	12.92	1101	3.181
9369	2009	outer	4.08	1101	3.181
9372	2009	inner	51.24	1894	8.4395
9372	2009	outer	32.76	1894	8.4395
9390	2009	inner	9.6	2503	3.0939
9390	2009	outer	5.4	2503	3.0939
9532	2009	inner	2.17	1781	5.0161
9532	2009	outer	4.83	1781	5.0161
10039	2009	inner	0.6	1276	2.2668
10039	2009	outer	0.4	1276	2.2668
10424	2009	inner	24.49	1387	3.4397
10424	2009	outer	6.51	1387	3.4397
10827	2009	inner	22.68	1806	2.9978
10827	2009	outer	13.32	1806	2.9978
11130	2009	inner	12.54	1481	2.404
11130	2009	outer	6.46	1481	2.404
11157	2009	inner	3	1843	7.2512
11157	2009	outer	3	1843	7.2512
11194	2009	inner	0.99	1740	3.3139
11194	2009	outer	2.01	1740	3.3139
11505	2009	inner	1	1322	10.9712
11505	2009	outer	0	1322	10.9712
11885	2009	inner	19.95	1757	5.613
11885	2009	outer	15.05	1757	5.613
11902	2009	inner	9.12	1679	3.7244
11902	2009	outer	2.88	1679	3.7244
12030	2009	inner	9.8	1633	1.0353
12030	2009	outer	4.2	1633	1.0353
12138	2009	inner	3.8	1718	2.1213
12138	2009	outer	6.2	1718	2.1213
12434	2009	inner	9.84	1754	1.8634
12434	2009	outer	14.16	1754	1.8634
12730	2009	inner	1.8	926	2.5285
12730	2009	outer	2.2	926	2.5285
12847	2009	inner	9.8	1848	3.954
12847	2009	outer	0.2	1848	3.954
12893	2009	inner	1	1414	4.4332
12893	2009	outer	0	1414	4.4332
13535	2009	inner	1	2030	2.089
13535	2009	outer	1	2030	2.089
19309	2009	inner	10.08	2011	2.7854
19309	2009	outer	3.92	2011	2.7854
40009	2009	inner	2.79	1132	2.2843
40009	2009	outer	0.21	1132	2.2843
40012	2009	inner	2.94	1823	6.3853
40012	2009	outer	4.06	1823	6.3853
40013	2009	inner	21	2147	7.5268
40013	2009	outer	9	2147	7.5268
40015	2009	inner	1	1574	3.1766
40015	2009	outer	3	1574	3.1766
40023	2009	inner	5	1935	2.2713
40023	2009	outer	5	1935	2.2713
40040	2009	inner	6.29	1526	3.656
40040	2009	outer	10.71	1526	3.656
40044	2009	inner	14.28	2015	1.2699
40044	2009	outer	6.72	2015	1.2699
40070	2009	inner	5.76	1526	2.6039
40070	2009	outer	2.24	1526	2.6039
2368	2010	inner	15.12	1882	12.2796
2368	2010	outer	5.88	1882	12.2796
2408	2010	inner	72.28	3344	2.575
2408	2010	outer	66.72	3344	2.575
4997	2010	inner	18	2490	10.8893
4997	2010	outer	7	2490	10.8893
9164	2010	inner	21.12	2357	3.8016
9164	2010	outer	44.88	2357	3.8016
9170	2010	inner	9.45	1884	5.8133
9170	2010	outer	11.55	1884	5.8133
9291	2010	inner	4.8	1701	7.5744
9291	2010	outer	0.2	1701	7.5744
9310	2010	inner	20.7	2429	6.4599
9310	2010	outer	2.3	2429	6.4599
9319	2010	inner	32.68	2599	3.7187
9319	2010	outer	10.32	2599	3.7187
9363	2010	inner	4.95	1896	1.7146
9363	2010	outer	4.05	1896	1.7146
9369	2010	inner	12	1914	2.0048
9369	2010	outer	12	1914	2.0048
9372	2010	inner	28.14	2712	10.6953
9372	2010	outer	38.86	2712	10.6953
9390	2010	inner	32.13	3235	3.3441
9390	2010	outer	18.87	3235	3.3441
9532	2010	inner	7.59	2584	4.5972
9532	2010	outer	3.41	2584	4.5972
10039	2010	inner	1	2462	4.3254
10039	2010	outer	0	2462	4.3254
10424	2010	inner	19.32	1854	3.8063
10424	2010	outer	1.68	1854	3.8063
10509	2010	inner	3.6	2542	1.508
10509	2010	outer	1.4	2542	1.508
10827	2010	inner	17.1	2038	3.4086
10827	2010	outer	1.9	2038	3.4086
11130	2010	inner	40.94	2039	4.4012
11130	2010	outer	5.06	2039	4.4012
11157	2010	inner	6.71	1703	7.4129
11157	2010	outer	4.29	1703	7.4129
11194	2010	inner	1.75	2836	3.2717
11194	2010	outer	5.25	2836	3.2717
11505	2010	inner	4.76	1986	9.9698
11505	2010	outer	9.24	1986	9.9698
11533	2010	inner	1.98	2218	3.2794
11533	2010	outer	4.02	2218	3.2794
11885	2010	inner	20.01	2573	6.2565
11885	2010	outer	8.99	2573	6.2565
11902	2010	inner	12.32	1985	4.5383
11902	2010	outer	3.68	1985	4.5383
12030	2010	inner	4.76	2217	1.0137
12030	2010	outer	9.24	2217	1.0137
12138	2010	inner	1.38	2195	4.2129
12138	2010	outer	4.62	2195	4.2129
12434	2010	inner	31.72	1961	2.2527
12434	2010	outer	20.28	1961	2.2527
12730	2010	inner	7.2	1987	3.8874
12730	2010	outer	0.8	1987	3.8874
12847	2010	inner	0	1654	2.9353
12847	2010	outer	11	1654	2.9353
12893	2010	inner	1	1620	6.721
12893	2010	outer	1	1620	6.721
13535	2010	inner	2	1737	1.9774
13535	2010	outer	0	1737	1.9774
19309	2010	inner	25.55	2387	1.9461
19309	2010	outer	9.45	2387	1.9461
40009	2010	inner	1	1652	2.5069
40009	2010	outer	0	1652	2.5069
40012	2010	inner	7	1524	9.3302
40012	2010	outer	0	1524	9.3302
40013	2010	inner	27	1602	2.8192
40013	2010	outer	48	1602	2.8192
40015	2010	inner	4	2149	3.2161
40015	2010	outer	6	2149	3.2161
40022	2010	inner	7.37	1298	1.6123
40022	2010	outer	3.63	1298	1.6123
40023	2010	inner	6.56	2434	2.4935
40023	2010	outer	1.44	2434	2.4935
40040	2010	inner	48.8	1999	3.5157
40040	2010	outer	12.2	1999	3.5157
40044	2010	inner	25.83	2883	1.3793
40044	2010	outer	15.17	2883	1.3793
40070	2010	inner	33.3	2434	2.4219
40070	2010	outer	11.7	2434	2.4219
